# Supplementary material
Source: PubMed Central journal article supplement (PMC10073270)

CDCP1 receptor density in UMUC3

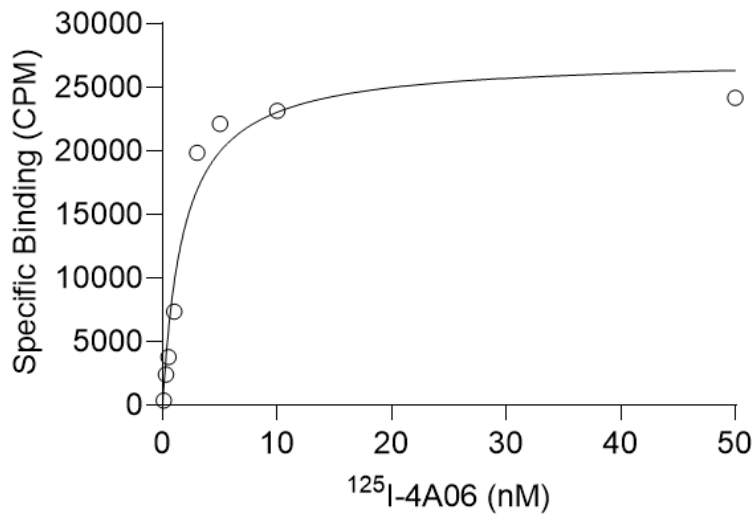

CDCP1 receptor density in TCC SUP

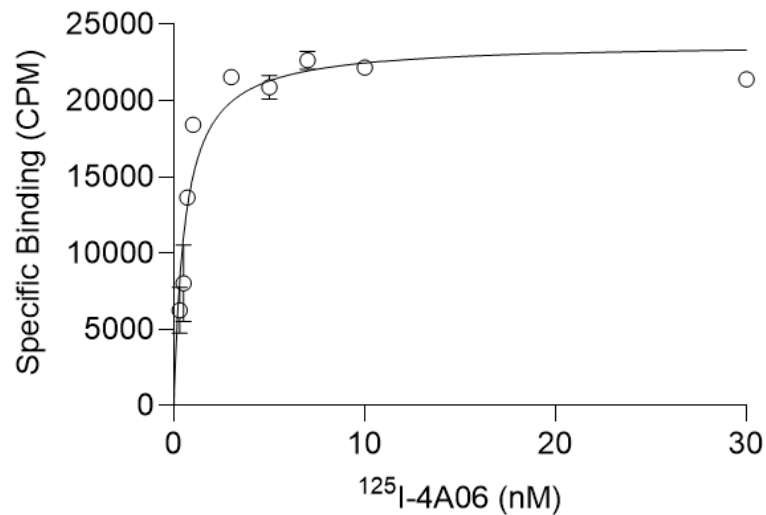

HT1376

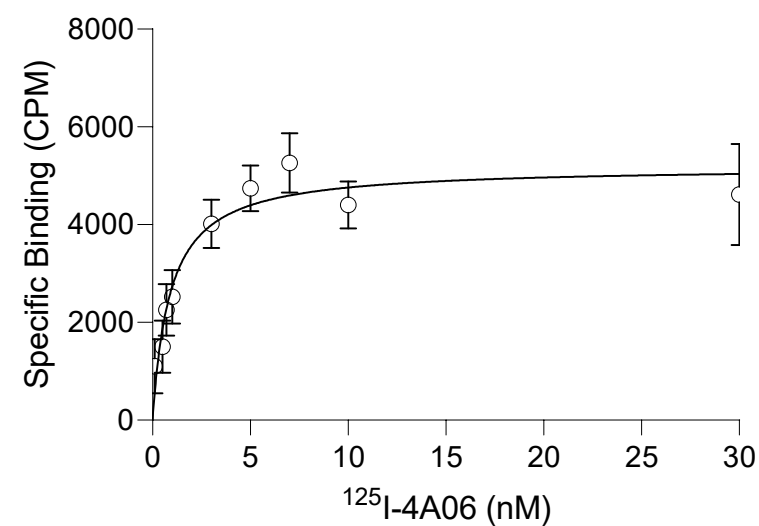

CDCP1 receptor density in 5637

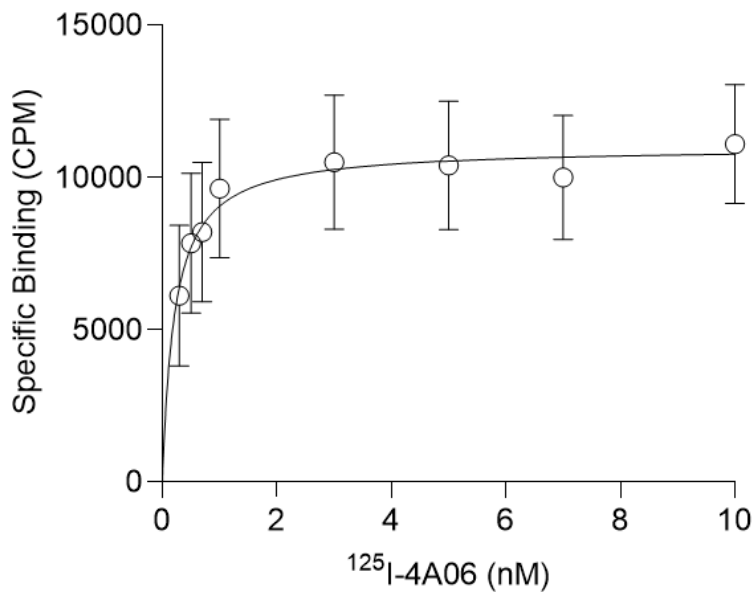

CDCP1 receptor density in UMUC9

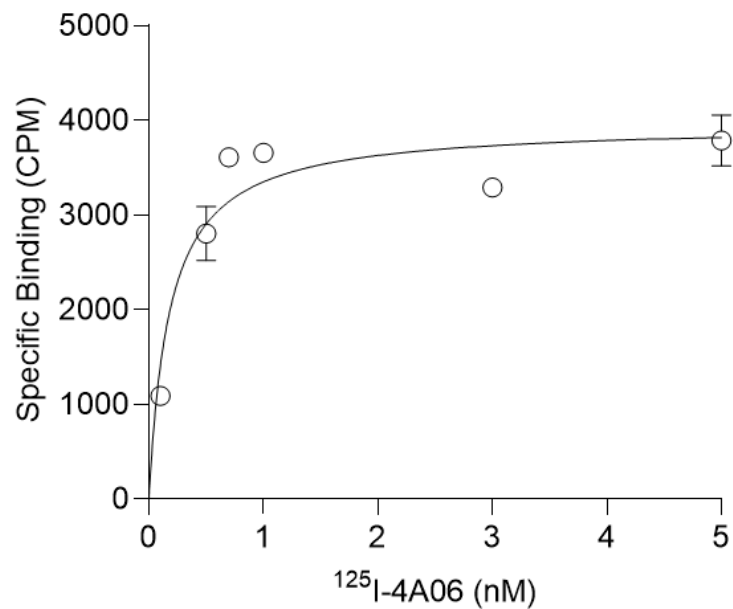

Supplement: NIHMS1867480-supplement-7.pdf [file NIHMS1867480-supplement-7.pdf]
