# Supplementary material
Source: PubMed Central journal article supplement (PMC10073270)

# Anitumor assessment study (HT1376)

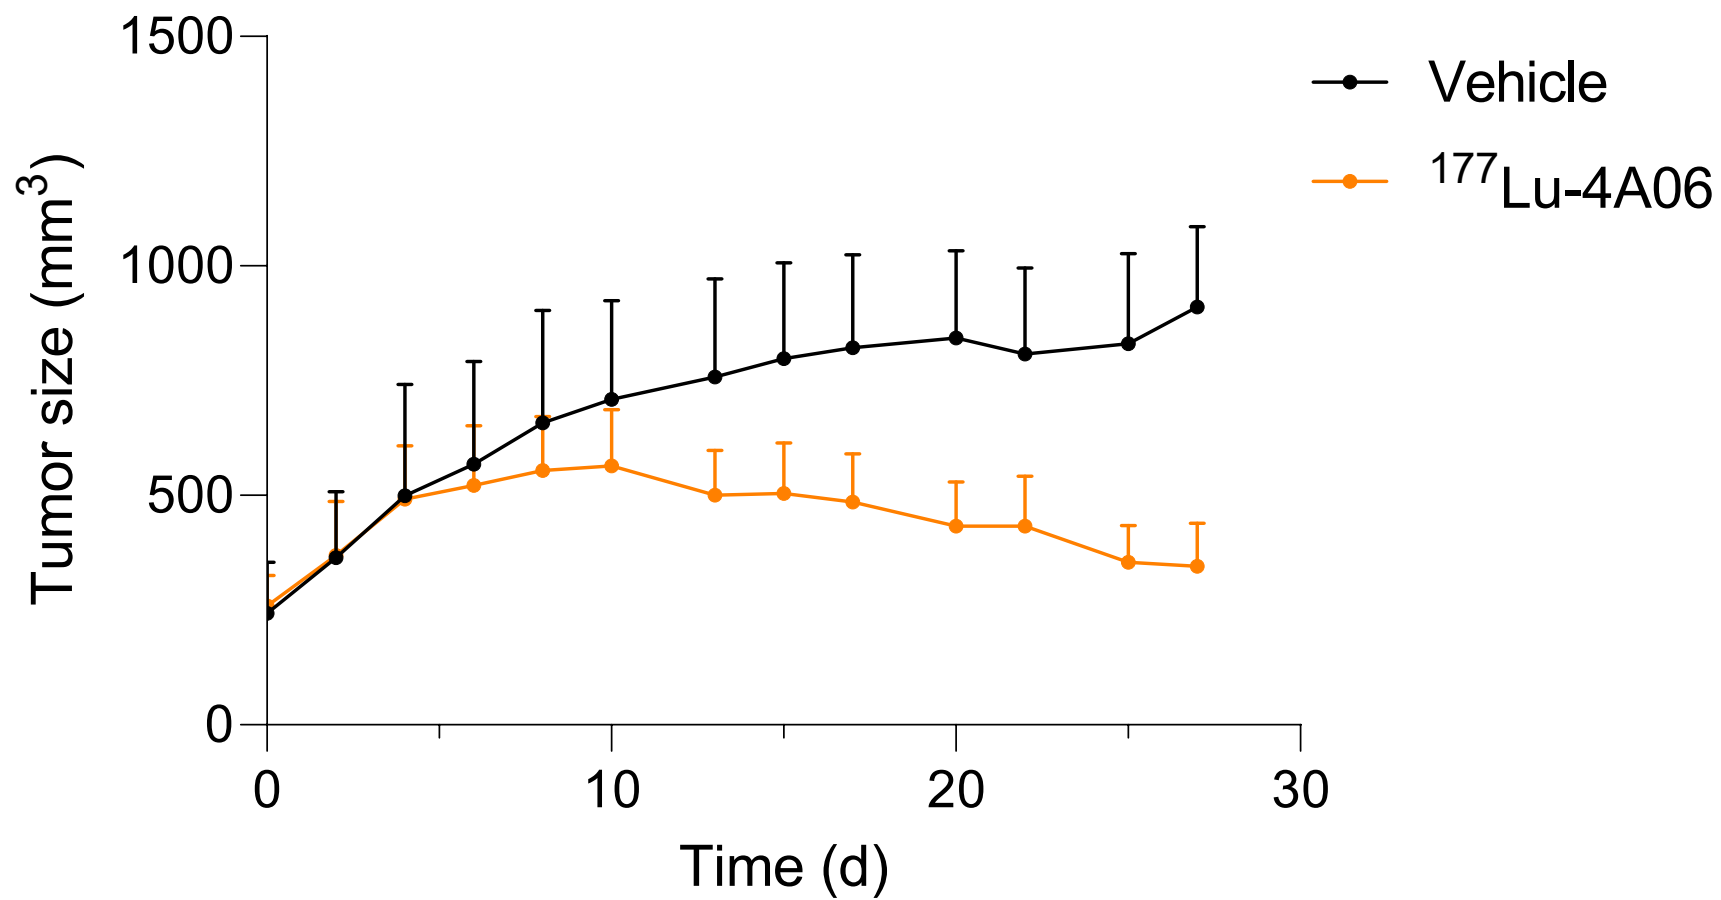

Supplement: NIHMS1867480-supplement-10.pdf [file NIHMS1867480-supplement-10.pdf]

# CDCP1 Expression by Stage

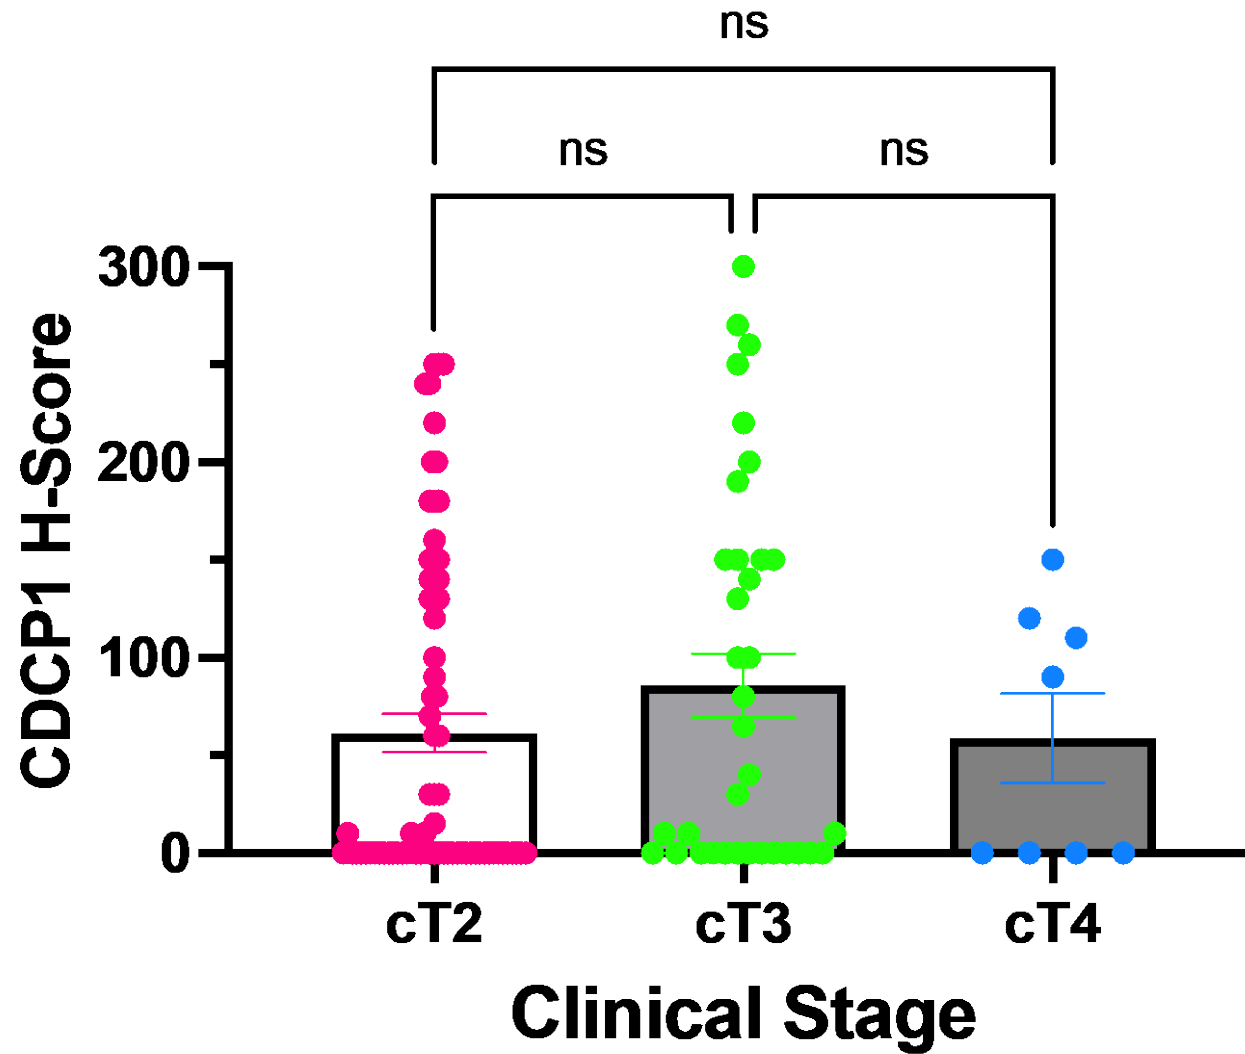

Supplement: NIHMS1867480-supplement-3.pdf [file NIHMS1867480-supplement-3.pdf]

# CDCP1

## Metastasis Status

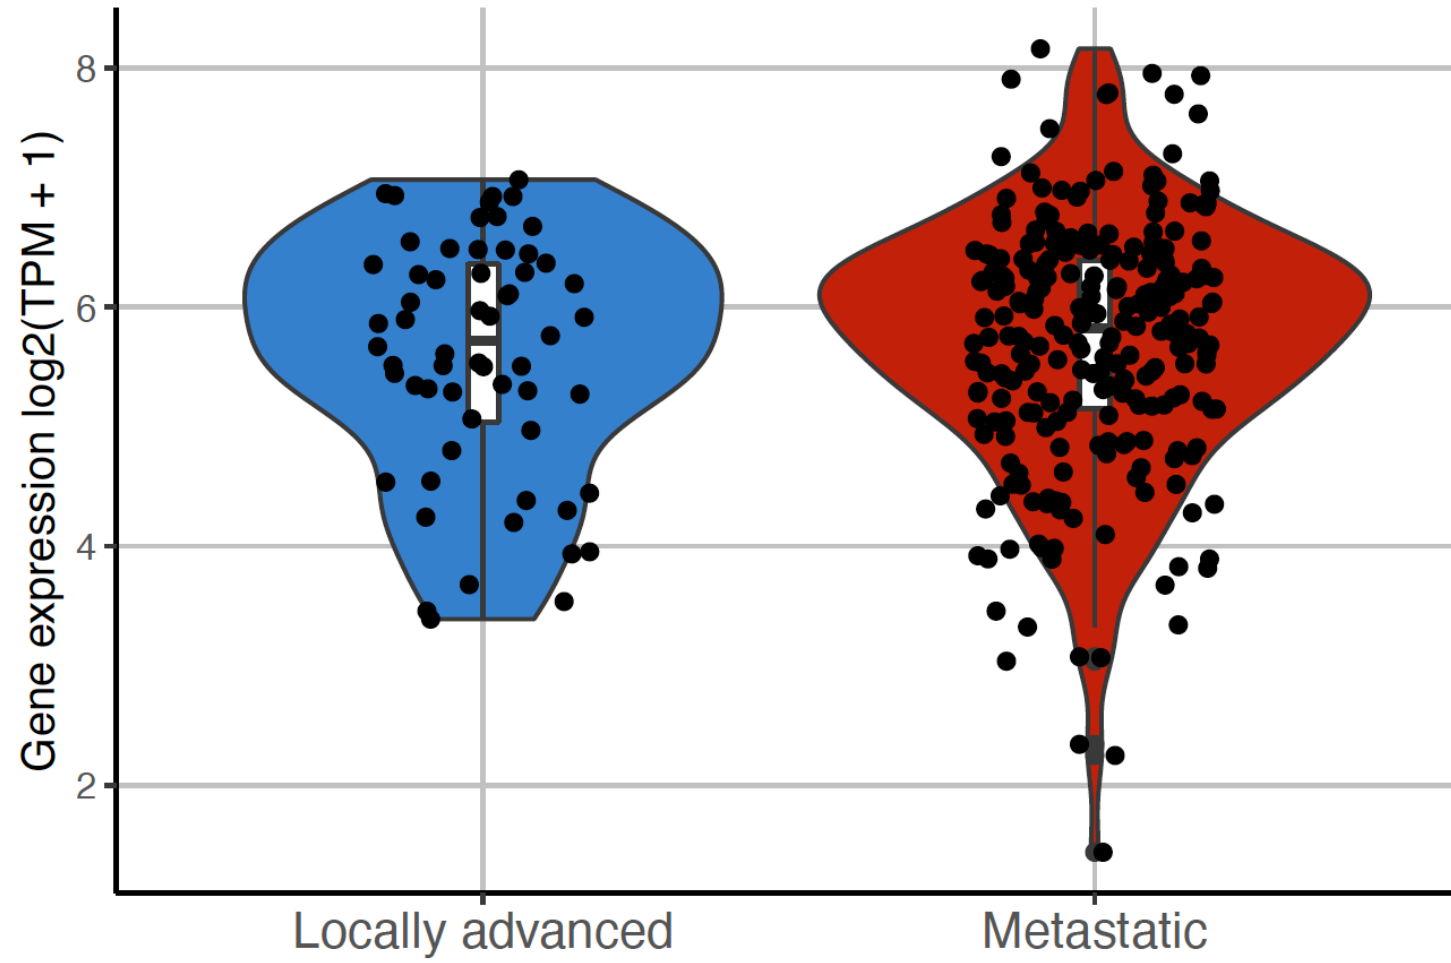

Supplement: NIHMS1867480-supplement-4.pdf [file NIHMS1867480-supplement-4.pdf]
